# Supplementary material for: Insights into the morphology and composition effects of one-dimensional CuPt nanostructures on the electrocatalytic activities and methanol oxidation mechanism by in situ FTIR
Source: Royal Society of Chemistry journal article supplement (doi:10.1039/d0nr01095b), 2020-01-01
Supplement: d0nr01095b1.pdf [file d0nr01095b1.pdf]

## Supporting Information

### **Insights into morphology and composition effects of one-dimensional CuPt nanostructures on the electrocatalytic activities and methanol oxidation mechanism by in situ FTIR**

Ping Li,<sup>a, b</sup> Cheng Du,<sup>a, b</sup> Xiaohui Gao,<sup>a, c</sup> Zhihua Zhuang,<sup>a, b</sup> Dong Xiang,<sup>a</sup> Chunmei Zhang,<sup>a</sup>

Wei Chen<sup>\*a, b</sup>

<sup>a</sup> State Key Laboratory of Electroanalytical Chemistry, Changchun Institute of Applied Chemistry,

Chinese Academy of Sciences, Changchun, Jilin 130022, China

<sup>b</sup> University of Science and Technology of China, Hefei, Anhui, 230026, China

<sup>c</sup> School of Physics and Electronics, Hunan Key Laboratory for Super-Microstructure and Ultrafast

Process, Central South University, Changsha 410083, Hunan, China

\* Corresponding author, E-mail address: [weichen@ciac.ac.cn](mailto:weichen@ciac.ac.cn)

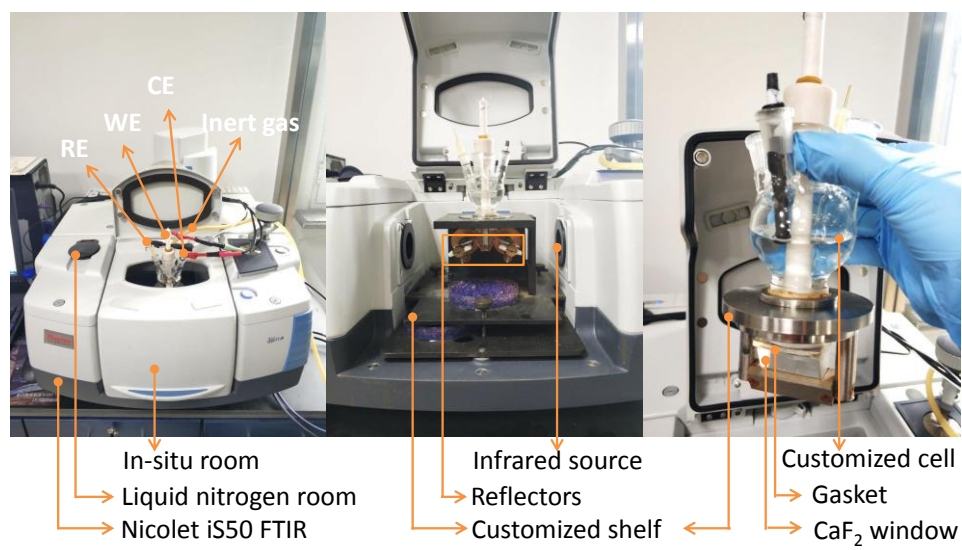

**Fig. S1** The instrument and setup for *in situ* electrochemical FTIR measurements.

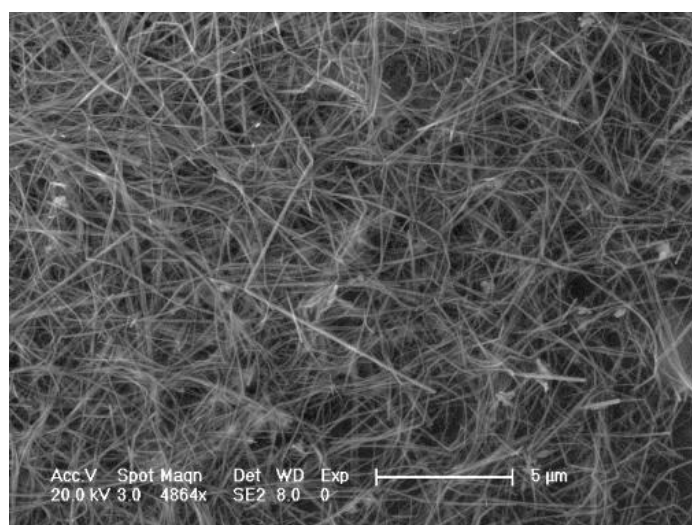

**Fig. S2** Large-scale SEM image of the prepared Cu nanowires.

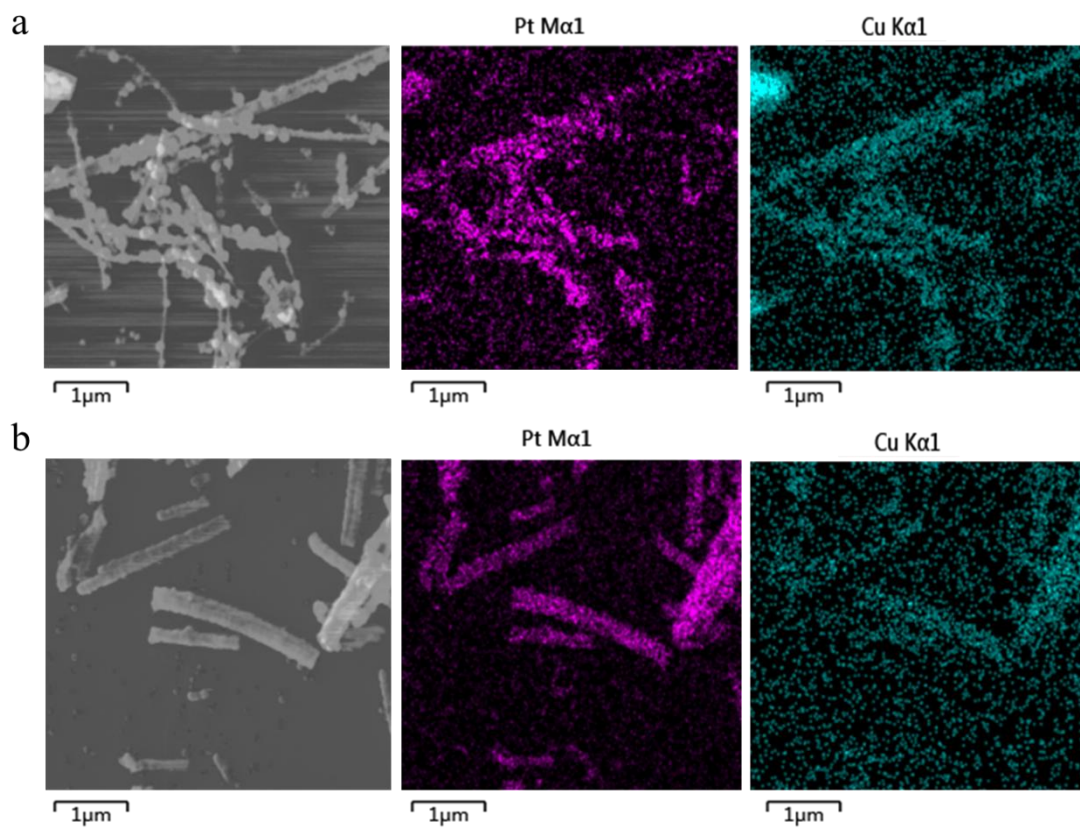

**Fig. S3** EDS-mapping the of CuPt<sub>1.78</sub> NTs (a) and CuPt<sub>2.22</sub> NWs (b).

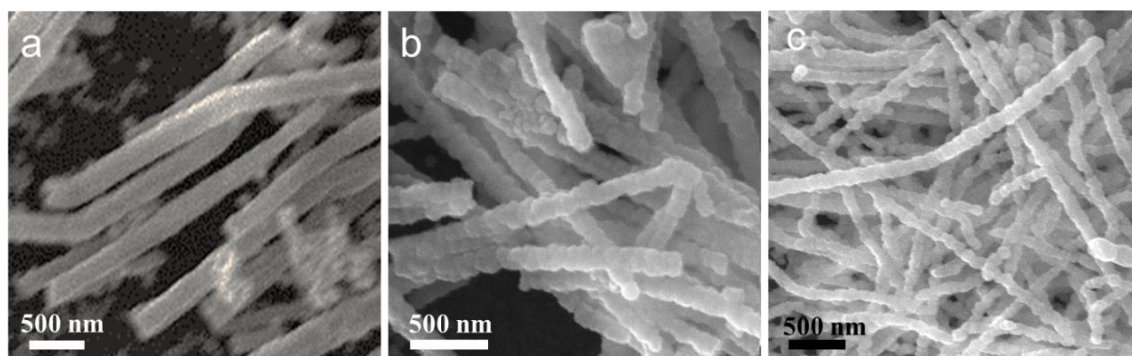

**Fig. S4** SEM images of (a) CuPt<sub>2.26</sub> NWs, (b) CuPt<sub>1.33</sub> NWs and (c) CuPt<sub>0.88</sub> NWs

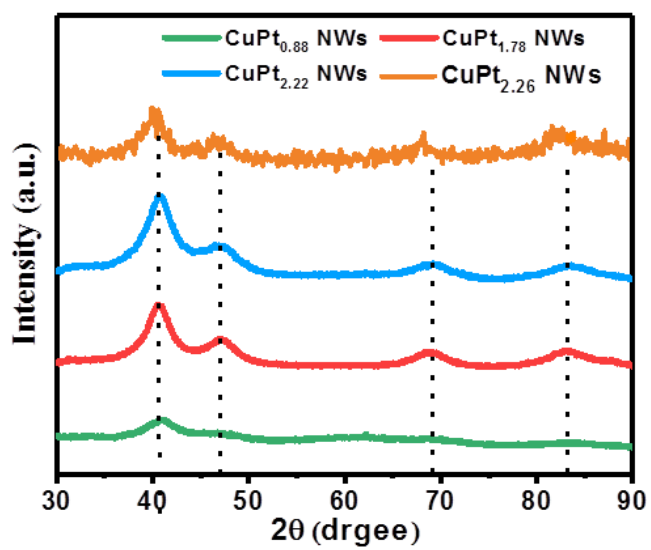

**Fig. S5** XRD patterns of the CuPt<sub>x</sub> NWs.

For the rotating ring disk electrode (RRDE) test, a RRDE (0.24 cm<sup>2</sup> for geometric surface area) was used as the working electrode, and the mass loading of the catalyst is same with that used for RED tests. The ring potential was held at 1.25 V vs. Ag/AgCl. The electron transfer numbers (n) and the percentage of H<sub>2</sub>O<sub>2</sub> yield for ORR on CuPt<sub>2.22</sub> NWs in O<sub>2</sub>-saturated 0.1 M KOH was determined by the following equations:

$$n = \frac{4I_D}{I_D + I_R/N}$$

$$H_2O_2\% = \frac{200I_R/N}{I_D + I_R/N}$$

where I<sub>R</sub> is the ring current, I<sub>D</sub> is the disk current, and N is the collection efficiency with a value of 0.37.

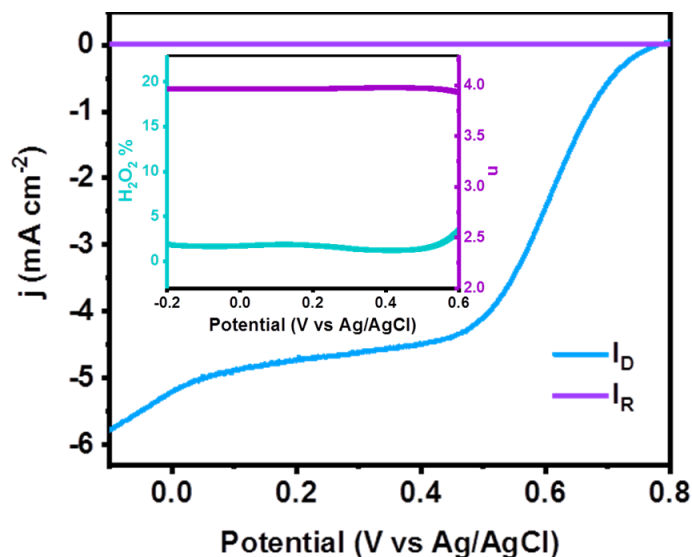

**Fig. S6** RRDE LSV for CuPt<sub>2.22</sub> NWs in O<sub>2</sub>-saturated 0.1 M HClO<sub>4</sub> at 1600 rpm. Inset is the electron transfer number (n) and the percentage of H<sub>2</sub>O<sub>2</sub> yield for ORR.

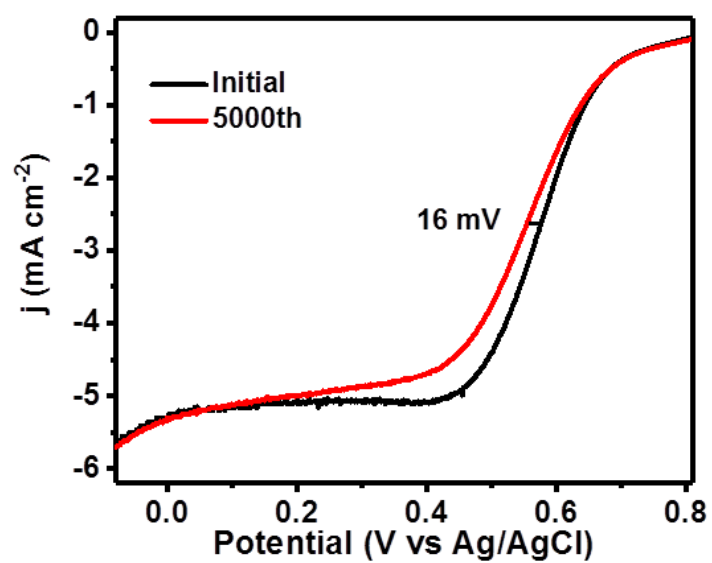

**Fig. S7** LSV curves of ORR on the CuPt<sub>2.22</sub> NWs before and after 5000 potential cycles in 0.1 M HClO<sub>4</sub>.

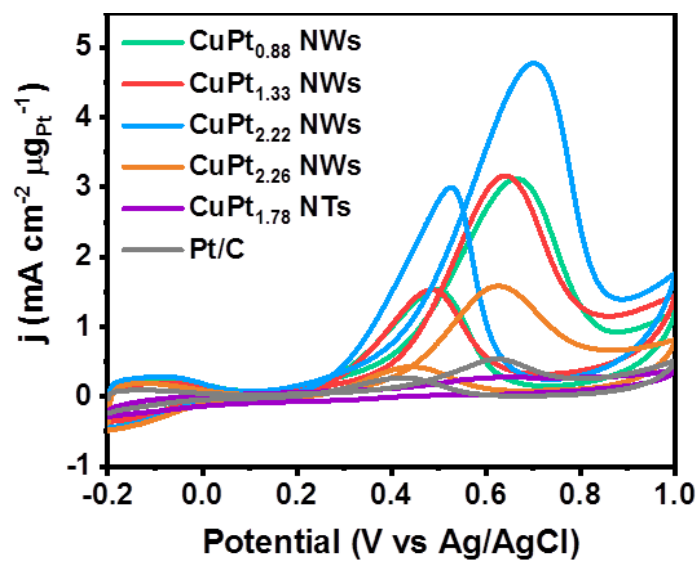

**Fig. S8** CV curves of methanol oxidation on different catalysts in 0.1 M HClO<sub>4</sub> + 0.5 M CH<sub>3</sub>OH with a potential scan rate of 50 mV s<sup>-1</sup> (current density is normalized by ECSA).

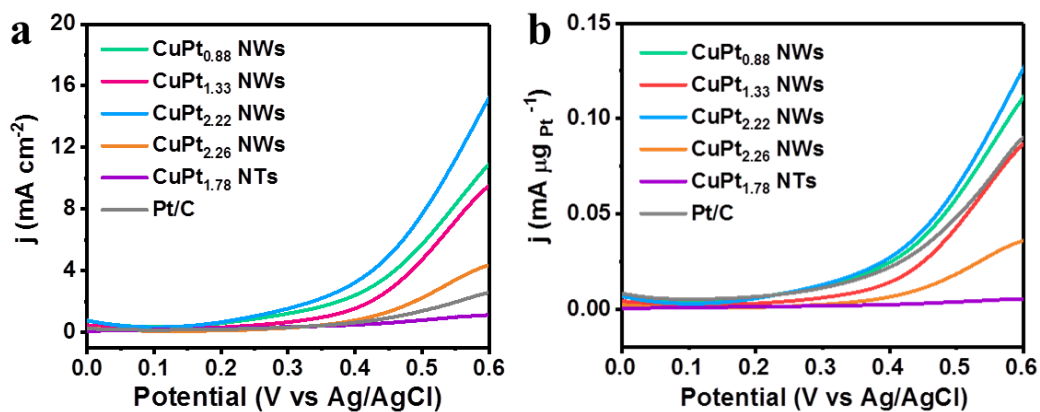

**Fig. S9** The amplified CV curves obtained from Fig. 5a, b.

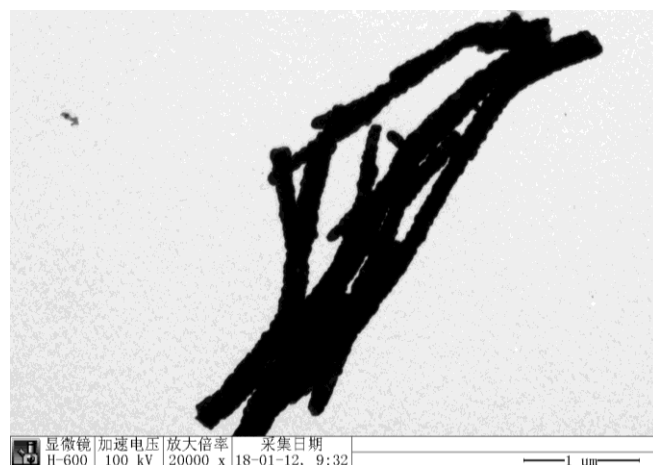

**Fig. S10** The representative TEM image of  $\text{CuPt}_{2.22}$  NWs after durability test.
